# Supplementary material for: Polymorphic Forms of Valinomycin Investigated by NMR Crystallography
Source: MDPI journal article supplement (doi:10.3390/ijms21144907), 2020-07-11
Supplement: s1 [file s1]

Supplementary Information to “Polymorphic Forms of Valinomycin Investigated  
by NMR Crystallography” by Czernek & Brus (*Int. J. Mol. Sci.* **2020**)

Table S1. The numbering of atoms of the triclinic polymorph (whose structure is available in Supplementary Materials as TRICLINIC.PDB file) used to describe spectral and structural parameters discussed in the main text.

| residue<br>number | residue<br>type | the backbone atom specification |                      |                      |               |               |
|-------------------|-----------------|---------------------------------|----------------------|----------------------|---------------|---------------|
|                   |                 | <i>X</i>                        | <i>C<sub>o</sub></i> | <i>C<sub>α</sub></i> | <i>Y</i>      | <i>Z</i>      |
| 1                 | <i>D</i> -Hyv   | N57<br>(N223)                   | C21<br>(C188)        | C20<br>(C187)        | O67<br>(O234) | C7<br>(C175)  |
| 2                 | <i>D</i> -Val   | O70<br>(O237)                   | C26<br>(C193)        | C25<br>(C192)        | N57<br>(N223) | C21<br>(C188) |
| 3                 | <i>L</i> -Lac   | N58<br>(N224)                   | C31<br>(C197)        | C30<br>(C196)        | O70<br>(O237) | C26<br>(C193) |
| 4                 | <i>L</i> -Val   | O73<br>(O240)                   | C34<br>(C200)        | C33<br>(C199)        | N58<br>(N224) | C31<br>(C197) |
| 5                 | <i>D</i> -Hyv   | N59<br>(N225)                   | C39<br>(C205)        | C38<br>(C204)        | O73<br>(O240) | C34<br>(C200) |
| 6                 | <i>D</i> -Val   | O76<br>(O243)                   | C43<br>(C209)        | C42<br>(C208)        | N59<br>(N225) | C39<br>(C205) |
| 7                 | <i>L</i> -Lac   | N60<br>(N226)                   | C48<br>(C214)        | C47<br>(C213)        | O76<br>(O243) | C43<br>(C209) |
| 8                 | <i>L</i> -Val   | O62<br>(O229)                   | C51<br>(C217)        | C50<br>(C216)        | N60<br>(N226) | C48<br>(C214) |
| 9                 | <i>D</i> -Hyv   | N56<br>(N222)                   | C3<br>(C171)         | C2<br>(C170)         | O62<br>(O229) | C51<br>(C217) |
| 10                | <i>D</i> -Val   | O65<br>(O232)                   | C9<br>(C177)         | C8<br>(C176)         | N56<br>(N222) | C3<br>(C171)  |
| 11                | <i>L</i> -Lac   | N55<br>(N221)                   | C16<br>(C183)        | C15<br>(C181)        | O65<br>(O232) | C9<br>(C177)  |
| 12                | <i>L</i> -Val   | O67<br>(O234)                   | C7<br>(C175)         | C1<br>(C169)         | N55<br>(N221) | C16<br>(C183) |

Table S2. The numbering of atoms of the monoclinic polymorph (whose structure is available in Supplementary Materials as MONOCLINIC.PDB file) used to describe spectral and structural parameters discussed in the main text.

| residue number | residue type  | the backbone atom specification |       |            |     |     |
|----------------|---------------|---------------------------------|-------|------------|-----|-----|
|                |               | $X$                             | $C_o$ | $C_\alpha$ | $Y$ | $Z$ |
| 1              | <i>D</i> -Hyv | N20                             | C34   | C30        | O2  | C29 |
| 2              | <i>D</i> -Val | O5                              | C39   | C35        | N20 | C34 |
| 3              | <i>L</i> -Lac | N21                             | C42   | C40        | O5  | C39 |
| 4              | <i>L</i> -Val | O8                              | C47   | C43        | N21 | C42 |
| 5              | <i>D</i> -Hyv | N22                             | C52   | C48        | O8  | C47 |
| 6              | <i>D</i> -Val | O11                             | C57   | C53        | N22 | C52 |
| 7              | <i>L</i> -Lac | N23                             | C60   | C58        | O11 | C57 |
| 8              | <i>L</i> -Val | O14                             | C65   | C61        | N23 | C60 |
| 9              | <i>D</i> -Hyv | N24                             | C70   | C66        | O14 | C65 |
| 10             | <i>D</i> -Val | O17                             | C75   | C71        | N24 | C70 |
| 11             | <i>L</i> -Lac | N19                             | C78   | C76        | O17 | C75 |
| 12             | <i>L</i> -Val | O2                              | C29   | C25        | N19 | C78 |

Table S3. The numbering of atoms of the ‘symmetric’ polymorph (whose structure is available in Supplementary Materials as SYMMETRIC.PDB file) used to describe spectral and structural parameters discussed in the main text.

| residue number | residue type  | the backbone atom specification |       |            |      |     |
|----------------|---------------|---------------------------------|-------|------------|------|-----|
|                |               | $X$                             | $C_o$ | $C_\alpha$ | $Y$  | $Z$ |
| 1              | <i>D</i> -Hyv | N146                            | C4    | C1         | O151 | C52 |
| 2              | <i>D</i> -Val | O167                            | C41   | C23        | N146 | C4  |
| 3              | <i>L</i> -Lac | N149                            | C47   | C44        | O167 | C41 |
| 4              | <i>L</i> -Val | O152                            | C53   | C50        | N149 | C47 |
| 5              | <i>D</i> -Hyv | N147                            | C5    | C2         | O152 | C53 |
| 6              | <i>D</i> -Val | O168                            | C42   | C29        | N147 | C5  |
| 7              | <i>L</i> -Lac | N150                            | C48   | C45        | O168 | C42 |
| 8              | <i>L</i> -Val | O153                            | C54   | C51        | N150 | C48 |
| 9              | <i>D</i> -Hyv | N145                            | C6    | C3         | O153 | C54 |
| 10             | <i>D</i> -Val | O166                            | C40   | C22        | N145 | C6  |
| 11             | <i>L</i> -Lac | N148                            | C46   | C43        | O166 | C40 |
| 12             | <i>L</i> -Val | O151                            | C52   | C49        | N148 | C46 |

Table S4. The numbering of atoms of the ‘propeller’ polymorph (whose structure is available in Supplementary Materials as PROPELLER.PDB file) used to describe spectral and structural parameters discussed in the main text and shown also in Table S9.

| residue number | residue type  | the backbone atom specification |       |            |     |     |            |
|----------------|---------------|---------------------------------|-------|------------|-----|-----|------------|
|                |               | $X$                             | $C_o$ | $C_\alpha$ | $Y$ | $Z$ | $H_{amid}$ |
| 1              | <i>D</i> -Hyv | N15                             | C10   | C9         | O8  | C3  | –          |
| 2              | <i>D</i> -Val | O22                             | C17   | C16        | N15 | C10 | H96        |
| 3              | <i>L</i> -Lac | N27                             | C24   | C23        | O22 | C17 | –          |
| 4              | <i>L</i> -Val | O34                             | C29   | C28        | N27 | C24 | H109       |
| 5              | <i>D</i> -Hyv | N41                             | C36   | C35        | O34 | C29 | –          |
| 6              | <i>D</i> -Val | O48                             | C43   | C42        | N41 | C36 | H126       |
| 7              | <i>L</i> -Lac | N53                             | C50   | C49        | O48 | C43 | –          |
| 8              | <i>L</i> -Val | O60                             | C55   | C54        | N53 | C50 | H139       |
| 9              | <i>D</i> -Hyv | N67                             | C62   | C61        | O60 | C55 | –          |
| 10             | <i>D</i> -Val | O74                             | C69   | C68        | N67 | C62 | H156       |
| 11             | <i>L</i> -Lac | N1                              | C77   | C75        | O74 | C69 | –          |
| 12             | <i>L</i> -Val | O8                              | C3    | C2         | N1  | C77 | H79        |

Table S5. The specification and values (in ppm) of the  $^{13}\text{C}$  SSNMR parameters of  $\alpha$  carbons in the monoclinic and triclinic polymorphs.

| polymorph    |                                    |                  |                                    |              |                |                  |                |
|--------------|------------------------------------|------------------|------------------------------------|--------------|----------------|------------------|----------------|
| triclinic    |                                    |                  |                                    | monoclinic   |                |                  |                |
| experimental |                                    | PW-PBE           |                                    | experimental |                | PW-PBE           |                |
| peak         | <i>ii</i> component: $\delta_{ii}$ | site             | <i>ii</i> component: $\sigma_{ii}$ | peak of      | $\delta^{iso}$ | site             | $\sigma^{iso}$ |
| H1           | 11: 100                            | <i>D</i> -Hyv 9  | 11: (58.6682+59.6540)/2            | D-Hyv        | 81.3           | D-Hyv 5          | 86.8263        |
| H1           | 22: 78                             | <i>D</i> -Hyv 9  | 22: (93.5526+93.1414)/2            |              |                |                  |                |
| H1           | 33: 66                             | <i>D</i> -Hyv 9  | 33: (106.1981+106.1069)/2          |              |                |                  |                |
| H2           | 11: 105                            | <i>D</i> -Hyv 5  | 11: (58.5057+53.6124)/2            | D-Hyv        | 77.1           | D-Hyv 1          | 93.3301        |
| H2           | 22: 68                             | <i>D</i> -Hyv 5  | 22: (102.1205+106.2545)/2          |              |                |                  |                |
| H2           | 33: 59                             | <i>D</i> -Hyv 5  | 33: (113.7510+113.7419)/2          |              |                |                  |                |
| H3           | 11: 96                             | <i>D</i> -Hyv 1  | 11: (67.5024+65.9476)/2            | D-Hyv        | 75.9           | D-Hyv 9          | 95.2835        |
| H3           | 22: 73                             | <i>D</i> -Hyv 1  | 22: (98.2170+102.3314)/2           |              |                |                  |                |
| H3           | 33: 58                             | <i>D</i> -Hyv 1  | 33: (113.1168+114.8188)/2          |              |                |                  |                |
| L1           | 11: 97                             | <i>L</i> -Lac 3  | 11: (64.1973+66.8905)/2            | L-Lac        | 72.9           | <i>L</i> -Lac 11 | 95.8564        |
| L1           | 22: 80                             | <i>L</i> -Lac 3  | 22: (89.5981+86.6424)/2            |              |                |                  |                |
| L1           | 33: 45                             | <i>L</i> -Lac 3  | 33: (129.8963+128.1672)/2          |              |                |                  |                |
| L2           | 11: 102                            | <i>L</i> -Lac 11 | 11: (59.5495+59.5399)/2            | L-Lac        | 71.0           | <i>L</i> -Lac 3  | 98.3721        |
| L2           | 22: 68                             | <i>L</i> -Lac 11 | 22: (100.0+101.0135)/2             |              |                |                  |                |
| L2           | 33: 43                             | <i>L</i> -Lac 11 | 33: (130.1504+130.6031)/2          |              |                |                  |                |
| L3           | 11: 98                             | <i>L</i> -Lac 7  | 11: (63.9822+63.8139)/2            | L-Lac        | 68.8           | <i>L</i> -Lac 7  | 99.2024        |
| L3           | 22: 71                             | <i>L</i> -Lac 7  | 22: (99.8615+100.3297)/2           |              |                |                  |                |
| L3           | 33: 38                             | <i>L</i> -Lac 7  | 33: (133.6399+134.2346)/2          |              |                |                  |                |

Table S6. The values (in ppm) of principal components of the  $^{15}\text{N}$  chemical shielding tensor of  $\text{N}_{\text{amid}}$ , provided by the GIAO-MP2 and GIAO-B3LYP methods applied with the 6-311++G(2d,2p) basis set, for various separations (in pm) of the *N*-methylacetamide – dimethylformamide dimer whose equilibrium structure (marked with ‘\*’) was obtained by the RIMP2/aug-cc-pVTZ geometry optimization carried out in a routine way using the RICC2 module of TURBOMOLE V7.1 (<http://www.cosmologic.de/turbomole/home.html>);  $R$  is the distance between the oxygen in dimethylformamide and the nitrogen in *N*-methylacetamide.

| $R$<br>(rounded) | MP2           |               |               | B3LYP         |               |               |
|------------------|---------------|---------------|---------------|---------------|---------------|---------------|
|                  | $\sigma_{11}$ | $\sigma_{22}$ | $\sigma_{33}$ | $\sigma_{11}$ | $\sigma_{22}$ | $\sigma_{33}$ |
| 250.7            | 50.9569       | 186.2322      | 234.2069      | 16.7613       | 169.0305      | 208.7232      |
| 260.7            | 53.2847       | 183.9515      | 238.2803      | 19.3408       | 166.4098      | 212.9477      |
| 270.7            | 56.8237       | 180.0219      | 243.7221      | 23.2693       | 161.8629      | 218.5301      |
| 280.7            | 57.528        | 179.1745      | 244.6701      | 24.0542       | 160.8806      | 219.4882      |
| 290.7*           | 58.1727       | 178.3815      | 245.4908      | 24.7743       | 159.9613      | 220.3115      |
| 300.7            | 58.7639       | 177.6403      | 246.2029      | 25.4359       | 159.1021      | 221.0196      |
| 310.7            | 59.3067       | 176.9483      | 246.8225      | 26.0444       | 158.3003      | 221.6296      |
| 320.7            | 61.0703       | 174.6403      | 248.5804      | 28.0279       | 155.6391      | 223.3229      |
| 340.7            | 62.3433       | 172.9421      | 249.5836      | 29.4673       | 153.7033      | 224.2835      |
| 370.7            | 63.6631       | 171.2098      | 250.3568      | 30.9504       | 151.7572      | 224.9977      |
| 400.7            | 64.5446       | 170.1236      | 250.7250      | 31.9371       | 150.5436      | 225.2851      |

Table S7. The values (in ppm) of the isotropic chemical shielding,  $\sigma^{\text{iso}}$ , and of the chemical shielding anisotropy,  $\text{CSA}_a$ , of the  $^{15}\text{N}$  sites described in the caption to Table S6.

| $R$<br>(rounded) | MP2                   |                | B3LYP                 |                |
|------------------|-----------------------|----------------|-----------------------|----------------|
|                  | $\sigma^{\text{iso}}$ | $\text{CSA}_a$ | $\sigma^{\text{iso}}$ | $\text{CSA}_a$ |
| 250.7            | 157.1320              | 164.5927       | 131.5050              | 175.5147       |
| 260.7            | 158.5055              | 164.6949       | 132.8994              | 175.0410       |
| 270.7            | 160.1892              | 164.5699       | 134.5541              | 173.9916       |
| 280.7            | 160.4575              | 164.4836       | 134.8077              | 173.7106       |
| 290.7*           | 160.6817              | 164.3805       | 135.0157              | 173.4250       |
| 300.7            | 160.8690              | 164.2647       | 135.1859              | 173.1378       |
| 310.7            | 161.0258              | 164.1404       | 135.3248              | 172.8522       |
| 320.7            | 161.4303              | 163.5930       | 135.6633              | 171.7642       |
| 340.7            | 161.6230              | 163.0413       | 135.8180              | 170.8354       |
| 370.7            | 161.7432              | 162.3038       | 135.9018              | 169.7245       |
| 400.7            | 161.7977              | 161.7199       | 135.9219              | 168.8746       |

$$\sigma^{\text{iso}} = \frac{1}{3}(\sigma_{11} + \sigma_{22} + \sigma_{33}); \text{CSA}_a = \sqrt{\sigma_{11}^2 + \sigma_{22}^2 + \sigma_{33}^2 + \sigma_{11}\sigma_{22} + \sigma_{22}\sigma_{33} + \sigma_{33}\sigma_{11}}$$

Figure S1. The distance dependence of the  $^{15}\text{N}$   $\sigma^{\text{iso}}$  data (in ppm) described in Tables S6 and S7.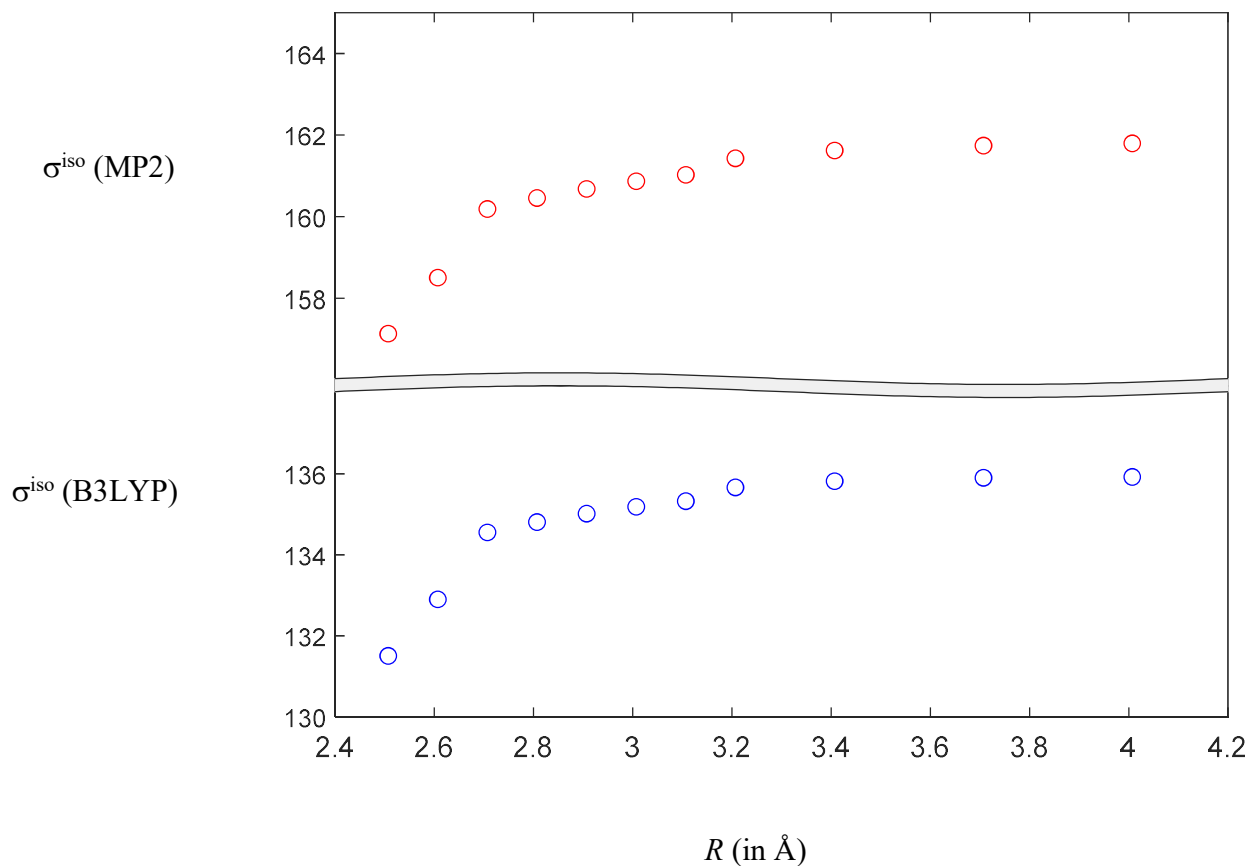

Figure S1 was created employing the ‘Break Y Axis’ script; citation: MikeCF (2020). Break Y Axis (<https://www.mathworks.com/matlabcentral/fileexchange/45760-break-y-axis>), MATLAB Central File Exchange. Retrieved May 18, 2020.

Table S8. Actual values of the data plotted in Figure 2 of the main text.

| $\chi$<br>(deg.) | $\sigma^{\text{iso}}$<br>(ppm) | comment                                                               |
|------------------|--------------------------------|-----------------------------------------------------------------------|
| 180              | 122.7514                       | unrelaxed                                                             |
| 163.43           | 121.7925                       | taken directly from the PW-PBE structure of the ‘propeller’ polymorph |
| 150              | 119.4218                       | unrelaxed                                                             |
| 120              | 114.4452                       | unrelaxed                                                             |
| 90               | 114.2811                       | unrelaxed                                                             |
| 60               | 115.9387                       | unrelaxed                                                             |
| 30               | 111.6539                       | unrelaxed                                                             |
| 0                | 107.9671                       | unrelaxed                                                             |
| -30              | 111.6577                       | unrelaxed                                                             |
| -60              | 116.5615                       | unrelaxed                                                             |
| -57.84           | 110.2896                       | taken directly from the PW-PBE structure of the ‘symmetric’ polymorph |

Table S9. Selected structural and spectral parameters of the amidic nitrogens of the ‘propeller’ polymorph. The  $N_{\text{amid}}-H_{\text{amid}}$  distances ( $r_{\text{NH}}$ ) are in picometers, all angles are in degrees, and  $\{\varepsilon_{11}, \varepsilon_{22}, \varepsilon_{33}, \text{CSA}_a, \nu_Q\}$  data are in ppm.

| residue number | residue type  | $r_{\text{NH}}$ | $\alpha$ | $\beta$ | $\gamma$ | $\varepsilon_{11}$ | $\varepsilon_{22}$ | $\varepsilon_{33}$ | $\text{CSA}_a$ | $\nu_Q$ |
|----------------|---------------|-----------------|----------|---------|----------|--------------------|--------------------|--------------------|----------------|---------|
| 2              | <i>D</i> -Val | 102.52          | 2.2      | 19.8    | 34.4     | 41.7               | 52.1               | 210.3              | 163.6          | 406     |
| 4              | <i>L</i> -Val | 101.64          | 5.4      | 15.0    | 11.5     | 43.3               | 78.5               | 217.2              | 159.3          | 369     |
| 6              | <i>D</i> -Val | 102.34          | 0.7      | 19.9    | 37.0     | 39.8               | 51.6               | 209.5              | 164.1          | 391     |
| 8              | <i>L</i> -Val | 101.58          | 1.6      | 16.0    | 8.0      | 39.7               | 80.1               | 218.0              | 162.0          | 370     |
| 10             | <i>D</i> -Val | 102.28          | 5.0      | 20.3    | 34.7     | 37.2               | 50.9               | 208.0              | 164.3          | 417     |
| 12             | <i>L</i> -Val | 101.50          | 0.6      | 14.7    | 8.0      | 44.2               | 78.6               | 212.8              | 154.3          | 389     |

The  $\{\alpha, \beta, \gamma\}$  angles describe an orientation of the  $^{15}\text{N}$  chemical shielding tensor (CST) in the peptide plane. The reference plane is defined by the respective  $N_{\text{amid}}$ ;  $C_o$ ;  $C_\alpha$  atoms (the numbering is provided in Table S4). The angle  $\alpha$  is defined by a projection onto this plane of the eigenvector,  $\xi_1$ , associated with the smallest eigenvalue of given CST. The angle  $\beta$  is subtended between a  $\xi_1$  and the related  $N_{\text{amid}}-H_{\text{amid}}$  bond vector (the corresponding  $H_{\text{amid}}$  atom numbers are collected in Table S4). The angle  $\gamma$  is defined by an angle between the normal to  $N_{\text{amid}}$ ;  $C_o$ ;  $C_\alpha$  plane and an eigenvector associated with the mid-shielded eigenvalue of the  $^{15}\text{N}$  CST in question.

The  $\{\varepsilon_{11}, \varepsilon_{22}, \varepsilon_{33}\}$  values are estimates of  $^{15}\text{N}$  chemical shift tensor components (see the main text). The  $\text{CSA}_a$  values are estimates of the chemical shift anisotropy contribution to autocorrelation:

$$\text{CSA}_a = \sqrt{\varepsilon_{11}^2 + \varepsilon_{22}^2 + \varepsilon_{33}^2 + \varepsilon_{11}\varepsilon_{22} + \varepsilon_{22}\varepsilon_{33} + \varepsilon_{33}\varepsilon_{11}}$$

The  $\nu_Q$  values are estimates of the  $^{14}\text{N}$  isotropic quadrupolar shift at the Larmor frequency,  $\nu_0$ , of 54.207 MHz (i.e., at a spectrometer with the magnetic field strength of 17.6 T):

$$\nu_Q = \frac{3}{40} \frac{C_Q^2}{\nu_0^2} \left( 1 + \frac{1}{3} \eta_Q^2 \right)$$

where  $C_Q$  is the  $^{14}\text{N}$  quadrupolar coupling constant and  $\eta_Q$  is the asymmetry parameter of the corresponding  $^{14}\text{N}$  electric field-gradient tensor (both parameters were obtained from a PW-PBE calculation and are not shown).

Table S10. The raw values of the  $^{17}\text{O}$  solid-state NMR parameters predicted for the carbonyl oxygens of the ‘propeller’ polymorph. The  $\{\sigma_{11}, \sigma_{22}, \sigma_{33}, \sigma^{\text{iso}}\}$  chemical shielding data are in ppm, the quadrupolar coupling constant,  $C_Q$ , are in MHz, and the asymmetry parameters,  $\eta_Q$ , are unitless. The ‘atom name’ entry refers to the Supplementary Materials PROPELLER.PDB file.

| residue number | residue type  | atom name | $\sigma_{11}$ | $\sigma_{22}$ | $\sigma_{33}$ | $\sigma^{\text{iso}}$ | $C_Q$  | $\eta_Q$ |
|----------------|---------------|-----------|---------------|---------------|---------------|-----------------------|--------|----------|
| 1              | <i>D</i> -Hyv | O4        | -309.2431     | -164.6439     | 348.5169      | -41.7901              | 8.4176 | 0.2655   |
| 2              | <i>D</i> -Val | O6        | -375.8535     | -233.1605     | 303.7083      | -101.7686             | 8.9496 | 0.1699   |
| 3              | <i>L</i> -Lac | O8        | -352.8890     | -179.2573     | 329.1473      | -67.6663              | 9.0567 | 0.2195   |
| 4              | <i>L</i> -Val | O9        | -307.5522     | -233.0764     | 308.3946      | -77.4113              | 8.6437 | 0.0952   |
| 5              | <i>D</i> -Hyv | O10       | -321.6722     | -176.4025     | 351.7048      | -48.7900              | 8.5646 | 0.2124   |
| 6              | <i>D</i> -Val | O12       | -352.9269     | -215.7830     | 307.6527      | -87.0191              | 8.7892 | 0.1207   |
| 7              | <i>L</i> -Lac | O13       | -354.3076     | -175.3749     | 332.6280      | -65.6848              | 9.0391 | 0.2042   |
| 8              | <i>L</i> -Val | O15       | -332.1441     | -250.5885     | 308.7396      | -91.3310              | 8.7529 | 0.1381   |
| 9              | <i>D</i> -Hyv | O16       | -321.7959     | -180.1362     | 354.8578      | -49.0248              | 8.5511 | 0.1964   |
| 10             | <i>D</i> -Val | O18       | -370.5943     | -229.2862     | 305.3186      | -98.1873              | 8.9084 | 0.1493   |
| 11             | <i>L</i> -Lac | O19       | -351.1187     | -179.7139     | 330.6891      | -66.7145              | 9.0047 | 0.2224   |
| 12             | <i>L</i> -Val | O21       | -312.4340     | -234.2772     | 314.1272      | -77.5280              | 8.6544 | 0.1201   |

Table S11. The solid phase structures investigated in this work (the unit cell parameters are shown which were actually used in analyses described in the main text).

| polymorph   | source <sup>1</sup> | space group                                                    | <i>a</i><br>[Å] | <i>b</i><br>[Å] | <i>c</i><br>[Å] | $\alpha$<br>[°] | $\beta$<br>[°] | $\gamma$<br>[°] | <i>V</i><br>[Å <sup>3</sup> ] |
|-------------|---------------------|----------------------------------------------------------------|-----------------|-----------------|-----------------|-----------------|----------------|-----------------|-------------------------------|
| triclinic   | VALINO              | <i>P</i> 1<br>(#1)                                             | 22.285          | 10.360          | 14.525          | 90.06           | 105.26         | 93.31           | 3229                          |
| monoclinic  | VALINM30            | <i>P</i> 2 <sub>1</sub><br>(#4)                                | 23.144          | 10.347          | 14.526          | 90              | 99.57          | 90              | 3430                          |
| "symmetric" | VALINK <sup>2</sup> | <i>C</i> 222 <sub>1</sub><br>(#20) <sup>3</sup>                | 14.274          | 14.274          | 44.497          | 90              | 90             | 56.58           | 7567                          |
| "propeller" | GEYHOH <sup>4</sup> | <i>P</i> 2 <sub>1</sub> 2 <sub>1</sub> 2 <sub>1</sub><br>(#19) | 16.618          | 24.924          | 18.451          | 90              | 90             | 90              | 7642                          |

eight pages in total

Footnotes to Table S11:

<sup>1</sup> The Cambridge Crystallographic Database identifier (<https://www.ccdc.cam.ac.uk/>).

<sup>2</sup> Counterions removed before the PW DFT optimization.

<sup>3</sup> The PW DFT optimization carried out in the corresponding primitive cell.

<sup>4</sup> The solvate atoms removed before the PW DFT optimization.
